# Supplementary material for: Psidium guajava mediated green synthesized cobalt oxide nanoparticles dispersed on reduced graphene oxide for electrocatalytic water splitting
Source: Royal Society of Chemistry journal article supplement (doi:10.1039/d5ra00040h), 2025-01-01
Supplement: d5ra00040h1.pdf [file d5ra00040h1.pdf]

### Supplementary Material

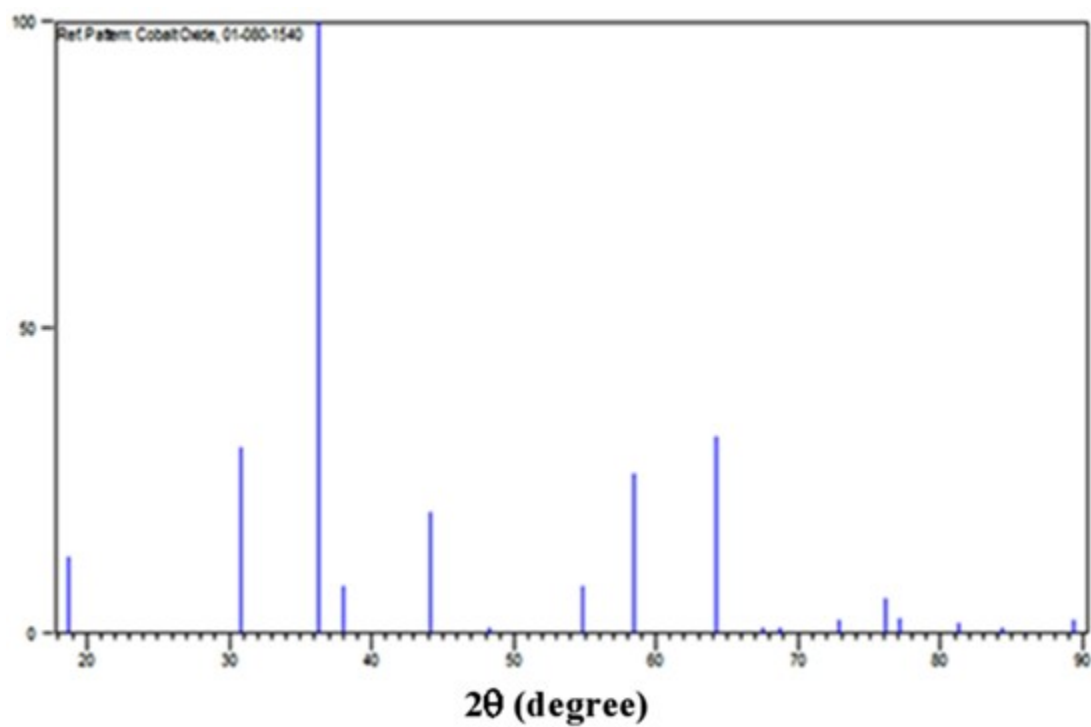

**Fig. S1.** Reference XRD spectrum of Co<sub>3</sub>O<sub>4</sub>

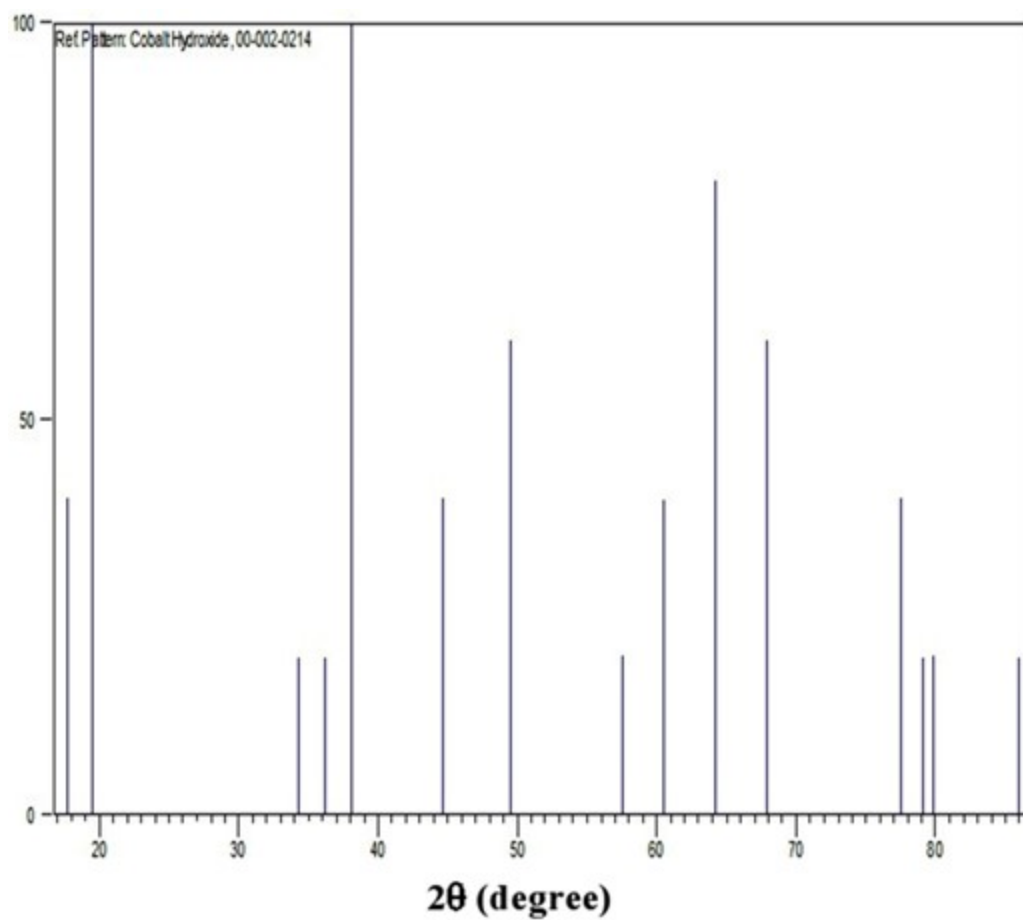

**Fig. S2.** Reference XRD spectrum of cobalt hydroxide

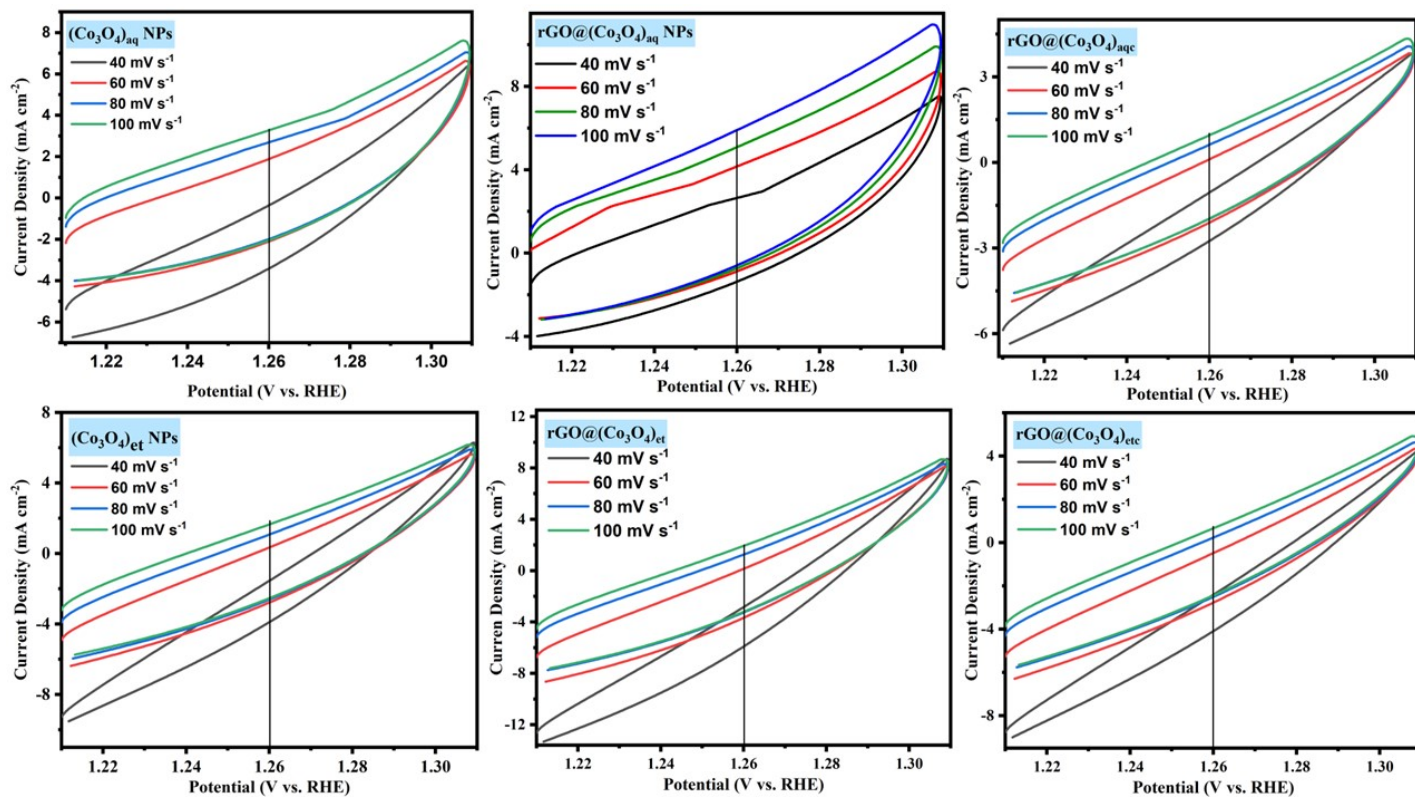

**Fig. S3.** Cyclic voltammograms of (Co<sub>3</sub>O<sub>4</sub>)<sub>aq</sub>, rGO@(Co<sub>3</sub>O<sub>4</sub>)<sub>aq</sub>, rGO@(Co<sub>3</sub>O<sub>4</sub>)<sub>aqc</sub>, (Co<sub>3</sub>O<sub>4</sub>)<sub>et</sub>, rGO@(Co<sub>3</sub>O<sub>4</sub>)<sub>et</sub> and rGO@(Co<sub>3</sub>O<sub>4</sub>)<sub>etc</sub>
